# Supplementary material for: Antinociceptive Effect of a p-Cymene/β-Cyclodextrin Inclusion Complex in a Murine Cancer Pain Model: Characterization Aided through a Docking Study
Source: Molecules. 2023 May 31;28(11):4465. doi: 10.3390/molecules28114465 (PMC10254339; doi:10.3390/molecules28114465)
Supplement: Supplementary file 1 [file molecules-28-04465-s001.zip › molecules-2352685-supplementary.pdf]

## Supplementary information

### HPLC method for quantification of *p*-cymene into $\beta$ -CD

The *p*-cymene content in the samples was determined with an HPLC instrument (model Shimadzu®) consisted of a vacuum degasser (model DGU-20A3), a binary pump (model LC-20 AD), an autosampler (model SIL-20A) and a diode array detector (model SPD-M20A vp) with interface CBM-20A. A reverse phase separation chromatography was achieved on the Phenomenex C<sub>18</sub> analytical column (150 mm x 4.6 mm i.d., 5  $\mu$ m). The isocratic mobile phase was a combination of methanol/acetonitrile (MeCN): water (H<sub>2</sub>O) (80:20) for 15 min run time with 1.0 mL min<sup>-1</sup> flow rate. Injection volume for all samples and standard solutions was 20  $\mu$ L and analysis was performed at ambient temperature.

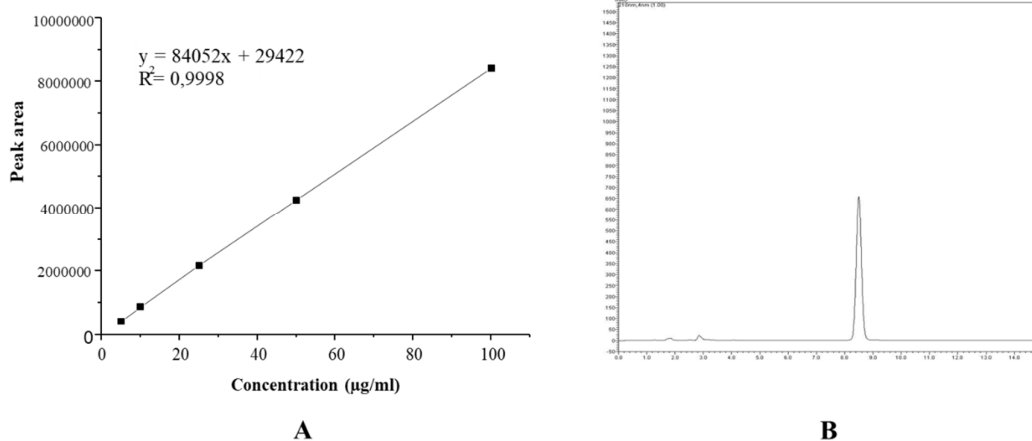

**Figure S1.** Linearity curve of *p*-cymene standard at concentration range (5-100  $\mu$ g/ml) at 210 nm (A) and signal response (8.49 min) of *p*-cymene at 100  $\mu$ g/ml concentration (B).

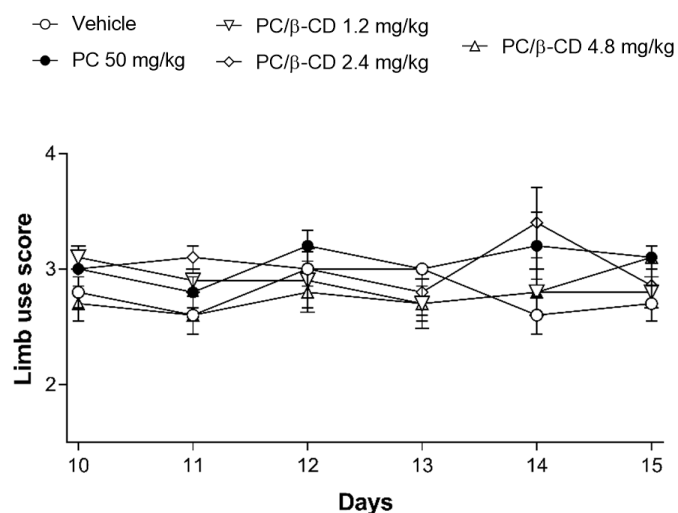

**Figure S2.** Effect of PC/β-CD complexes (1.2, 2.4 and 4.8 mg/kg, p.o.) and isolated PC (50 mg/kg, p.o.) on paw use in animals with S180 tumor. Values are expressed as mean ± S.E.M.

**Table S1:** Body weight, water e and feed consumption of male and female mice (n = 05/group) submitted to acute treatment with PC (55, 175 or 550 mg/kg, p.o.). The values are expressed as Mean ± E.P.M. of the parameters evaluated during 14 days. ANOVA follow Tukey's test: \*p < 0.05 vs vehicle; \*\*p < 0.01 vs vehicle.

| Treatment    | Body weight (g) |              | Water (ml)  |            | Food (g)   |            |
|--------------|-----------------|--------------|-------------|------------|------------|------------|
|              | Male            | Female       | Male        | Female     | Male       | Female     |
| Vehicle      | 32.4 ± 0.5      | 26.4 ± 0.3   | 13.5 ± 1.3  | 8.9 ± 0.9  | 9.5 ± 0.8  | 6.4 ± 0.4  |
| PC 55 mg/kg  | 28.3 ± 0.9**    | 23.7 ± 0.4** | 23.1 ± 2.8* | 10.2 ± 1.2 | 9.1 ± 1.1  | 6.8 ± 0.2  |
| PC 175 mg/kg | 29.6 ± 0.5*     | 27.2 ± 0.6   | 23.3 ± 2.4* | 12.6 ± 1.2 | 10.5 ± 1.6 | 8.8 ± 0.4* |
| PC 550 mg/kg | 33.6 ± 0.4      | 26.8 ± 0.4   | 17.5 ± 1.3  | 13.9 ± 1.7 | 10.9 ± 0.9 | 7.5 ± 0.8  |

**Table S2:** Relative (Absolute organ weight \* 100/Animal final weight) organ weight of mice at the end of acute dosing of PC at different doses. Values are expressed as mean  $\pm$  S.E.M. no significant difference was identified.

|                       | Relative weight of organs (%) |               |               |               |               |               |               |
|-----------------------|-------------------------------|---------------|---------------|---------------|---------------|---------------|---------------|
|                       | Liver                         | Spleen        | Kidney        | Brain         | Lung          | Heart         | Stomach       |
| <b>Vehicle</b> ♂      | 5.0 $\pm$ 0.2                 | 0.7 $\pm$ 0.1 | 1.6 $\pm$ 0.0 | 1.3 $\pm$ 0.1 | 0.8 $\pm$ 0.0 | 0.5 $\pm$ 0.0 | 1.6 $\pm$ 0.2 |
| <b>PC 55 mg/kg</b> ♂  | 5.2 $\pm$ 0.1                 | 1.3 $\pm$ 0.1 | 1.7 $\pm$ 0.1 | 1.4 $\pm$ 0.1 | 0.7 $\pm$ 0.1 | 0.6 $\pm$ 0.0 | 0.8 $\pm$ 0.1 |
| <b>PC 175 mg/kg</b> ♂ | 4.9 $\pm$ 0.4                 | 0.9 $\pm$ 0.2 | 1.6 $\pm$ 0.0 | 1.1 $\pm$ 0.2 | 0.7 $\pm$ 0.1 | 0.8 $\pm$ 0.3 | 0.8 $\pm$ 0.4 |
| <b>PC 550 mg/kg</b> ♂ | 5.4 $\pm$ 0.3                 | 0.8 $\pm$ 0.1 | 1.5 $\pm$ 0.0 | 1.2 $\pm$ 0.1 | 0.7 $\pm$ 0.1 | 0.5 $\pm$ 0.0 | 1.3 $\pm$ 0.1 |
| <b>Vehicle</b> ♀      | 5.0 $\pm$ 0.3                 | 0.7 $\pm$ 0.0 | 1.5 $\pm$ 0.0 | 1.4 $\pm$ 0.0 | 1.0 $\pm$ 0.1 | 0.5 $\pm$ 0.0 | 1.5 $\pm$ 0.1 |
| <b>PC 55 mg/kg</b> ♀  | 4.9 $\pm$ 0.4                 | 0.7 $\pm$ 0.1 | 1.7 $\pm$ 0.1 | 1.3 $\pm$ 0.2 | 1.6 $\pm$ 0.6 | 0.9 $\pm$ 0.4 | 1.4 $\pm$ 0.1 |
| <b>PC 175 mg/kg</b> ♀ | 5.2 $\pm$ 0.2                 | 0.9 $\pm$ 0.3 | 1.6 $\pm$ 0.1 | 1.4 $\pm$ 0.2 | 0.8 $\pm$ 0.1 | 0.5 $\pm$ 0.0 | 1.5 $\pm$ 0.2 |
| <b>PC 550 mg/kg</b> ♀ | 5.2 $\pm$ 0.3                 | 0.6 $\pm$ 0.1 | 1.5 $\pm$ 0.1 | 1.5 $\pm$ 0.0 | 1.1 $\pm$ 0.2 | 0.4 $\pm$ 0.5 | 1.3 $\pm$ 0.1 |

**Table S3:** Biochemical parameters of male and female mice at the end of acute toxicity study. Values are expressed as mean  $\pm$  S.E.M. ANOVA follow Tukey's test: \*p < 0.05 vs vehicle; \*\*p < 0.01 vs vehicle.

| <i>Biochemical parameters</i> | Male             |                   |                  |                  | Female           |                  |                   |                 |
|-------------------------------|------------------|-------------------|------------------|------------------|------------------|------------------|-------------------|-----------------|
|                               | Vehicle          | PC 55 mg/kg       | PC 175 mg/kg     | PC 550 mg/kg     | Vehicle          | PC 55 mg/kg      | PC 175 mg/kg      | PC 550 mg/kg    |
| Urea (mg/dL)                  | 39.5 $\pm$ 4.1   | 60.8 $\pm$ 9.4    | 65.8 $\pm$ 12.1  | 42.5 $\pm$ 5.1   | 36.5 $\pm$ 3.9   | 44.6 $\pm$ 7.7   | 36.2 $\pm$ 3.4    | 32.6 $\pm$ 8.2  |
| Uric acid (mg/dL)             | 2.9 $\pm$ 0.1    | 3.2 $\pm$ 0.4     | 3.2 $\pm$ 0.1    | 3.6 $\pm$ 0.2    | 2.9 $\pm$ 0.2    | 3.4 $\pm$ 0.6    | 3.8 $\pm$ 0.1     | 3.2 $\pm$ 0.1   |
| Creatinine (mg/dL)            | 0.2 $\pm$ 0.0    | 0.3 $\pm$ 0.0     | 0.3 $\pm$ 0.0    | 0.4 $\pm$ 0.0**  | 0.3 $\pm$ 0.0    | 0.4 $\pm$ 0.0    | 0.4 $\pm$ 0.0     | 0.4 $\pm$ 0.0   |
| Total protein (mg/dL)         | 5.5 $\pm$ 0.1    | 4.7 $\pm$ 0.3     | 5.0 $\pm$ 0.4    | 6.5 $\pm$ 0.1    | 5.9 $\pm$ 0.1    | 6.1 $\pm$ 0.1    | 6.5 $\pm$ 0.3     | 6.8 $\pm$ 0.5   |
| Albumin (mg/dL)               | 2.3 $\pm$ 0.0    | 2.2 $\pm$ 0.1     | 2.3 $\pm$ 0.0    | 2.5 $\pm$ 0.1    | 2.6 $\pm$ 0.0    | 2.6 $\pm$ 0.0    | 2.7 $\pm$ 0.1     | 2.5 $\pm$ 0.1   |
| Globulin (mg/dL)              | 3.2 $\pm$ 0.14   | 2.3 $\pm$ 0.3     | 2.7 $\pm$ 0.4    | 3.9 $\pm$ 0.1    | 3.4 $\pm$ 0.2    | 3.3 $\pm$ 0.0    | 3.3 $\pm$ 0.7     | 4.3 $\pm$ 0.5   |
| AST (U/L)                     | 125.0 $\pm$ 24.9 | 178.0 $\pm$ 40.8  | 129.3 $\pm$ 23.1 | 96.6 $\pm$ 5.1   | 160.6 $\pm$ 27.4 | 114.0 $\pm$ 11.8 | 139.4 $\pm$ 41.0  | 99.6 $\pm$ 8.5  |
| ALT (U/L)                     | 56.8 $\pm$ 5.0   | 102.6 $\pm$ 9.3** | 69.0 $\pm$ 11.0  | 61.0 $\pm$ 6.8   | 60.6 $\pm$ 7.7   | 54.6 $\pm$ 3.7   | 103.0 $\pm$ 50.7  | 50.2 $\pm$ 4.1  |
| ALP (U/L)                     | 79.8 $\pm$ 7.4   | 106.1 $\pm$ 8.1   | 99.5 $\pm$ 7.8   | 114.6 $\pm$ 9.5* | 195.9 $\pm$ 39.3 | 142.2 $\pm$ 19.8 | 126.8 $\pm$ 11.8  | 118.0 $\pm$ 2.5 |
| Glucose (mg/dl)               | 28.6 $\pm$ 5.7   | 63.7 $\pm$ 17.3   | 43.8 $\pm$ 13.7  | 81.0 $\pm$ 10.7  | 55.7 $\pm$ 6.3   | 60.2 $\pm$ 15.6  | 101.4 $\pm$ 12.0* | 80.2 $\pm$ 3.6  |

  

| <i>Hematological parameters</i>                     | Male           |                |                |                | Female         |                |                |                |
|-----------------------------------------------------|----------------|----------------|----------------|----------------|----------------|----------------|----------------|----------------|
|                                                     | Vehicle        | PC 55 mg/kg    | PC 175 mg/kg   | PC 550 mg/kg   | Vehicle        | PC 55 mg/kg    | PC 175 mg/kg   | PC 550 mg/kg   |
| Red blood cells (10 <sup>6</sup> /mm <sup>3</sup> ) | 10.6 $\pm$ 0.7 | 8.8 $\pm$ 0.5  | 9.4 $\pm$ 0.2  | 10.1 $\pm$ 0.3 | 9.8 $\pm$ 0.3  | 9.4 $\pm$ 0.5  | 9.6 $\pm$ 0.2  | 10.2 $\pm$ 0.3 |
| Hemoglobin (g/dL)                                   | 17.0 $\pm$ 0.9 | 13.7 $\pm$ 1.1 | 14.9 $\pm$ 0.3 | 15.6 $\pm$ 0.4 | 15.4 $\pm$ 0.7 | 14.2 $\pm$ 0.9 | 15.0 $\pm$ 0.5 | 15.8 $\pm$ 0.4 |
| Hematocrit (%)                                      | 49.1 $\pm$ 2.6 | 40.8 $\pm$ 3.0 | 44.3 $\pm$ 0.9 | 46.0 $\pm$ 1.1 | 45.2 $\pm$ 1.9 | 42.1 $\pm$ 2.3 | 44.6 $\pm$ 1.1 | 46.7 $\pm$ 1.1 |
| Leukocytes (10 <sup>6</sup> /mm <sup>3</sup> )      | 6.5 $\pm$ 1.0  | 7.6 $\pm$ 0.9  | 7.0 $\pm$ 1.0  | 6.7 $\pm$ 0.9  | 13.4 $\pm$ 3.3 | 7.6 $\pm$ 0.9  | 7.2 $\pm$ 1.1  | 7.2 $\pm$ 1.0  |
| Neutrophils (%)                                     | 4.9 $\pm$ 0.5  | 6.6 $\pm$ 1.1  | 7.7 $\pm$ 1.8  | 7.0 $\pm$ 1.7  | 6.5 $\pm$ 0.7  | 7.0 $\pm$ 0.9  | 6.7 $\pm$ 1.7  | 5.3 $\pm$ 0.9  |
| Lymphocytes (%)                                     | 91.5 $\pm$ 0.8 | 89.0 $\pm$ 0.9 | 87.9 $\pm$ 2.1 | 89.8 $\pm$ 1.7 | 90.2 $\pm$ 0.3 | 88.5 $\pm$ 0.9 | 86.6 $\pm$ 2.8 | 91.2 $\pm$ 1.0 |
| Monocytes (%)                                       | 3.2 $\pm$ 0.5  | 3.9 $\pm$ 0.3  | 3.7 $\pm$ 0.4  | 3.0 $\pm$ 0.3  | 2.9 $\pm$ 0.4  | 4.1 $\pm$ 0.4  | 3.9 $\pm$ 0.6  | 3.1 $\pm$ 0.3  |
| Eosinophils (%)                                     | 0.1 $\pm$ 0.0  | 0.1 $\pm$ 0.0  | 0.1 $\pm$ 0.0  | 0.1 $\pm$ 0.0  | 0.0 $\pm$ 0.0  | 0.1 $\pm$ 0.0  | 0.0 $\pm$ 0.0  | 0.1 $\pm$ 0.0  |

ALP – Alkaline phosphatase; AST - Aspartate aminotransferase; ALT - Alanine aminotransferase.
